# Supplementary material for: Isolated Rearing at Lactation Increases Gut Microbial Diversity and Post-weaning Performance in Pigs
Source: Front Microbiol. 2018 Nov 29;9:2889. doi: 10.3389/fmicb.2018.02889 (PMC6282802; doi:10.3389/fmicb.2018.02889)
Supplement: Supplementary file 1 [file Table_1.pdf]

**Table S1** Body weight and average daily gain of pigs reared with the sow (SR) or in isolation (IR).

| Item                                 | Treatments          |                     |       | P - Value    |                   |           |
|--------------------------------------|---------------------|---------------------|-------|--------------|-------------------|-----------|
|                                      | CR (n = 40)         | IR (n = 40)         | SEM   | Trt          | Sex               | Trt x Sex |
| <b>Body weight, kg</b>               |                     |                     |       |              |                   |           |
| At birth (d 0)                       | 1.24                | 1.27                | 0.042 | 0.565        |                   |           |
| Weaned (d 21)                        | 5.79                | 6.07                | 0.214 | 0.375        |                   |           |
| Nursery                              |                     |                     |       |              |                   |           |
| End of Phase 1 (d 29)                | 5.61 <sup>x</sup>   | 6.12 <sup>y</sup>   | 0.193 | 0.078        |                   |           |
| End of phase 2 (d 50)                | 11.88 <sup>a</sup>  | 14.03 <sup>b</sup>  | 0.408 | <b>0.002</b> | 0.140             | 0.568     |
| End of phase 3 (d 62)                | 19.26 <sup>a</sup>  | 22.15 <sup>b</sup>  | 0.532 | <b>0.002</b> | 0.095             | 0.349     |
| Grower                               |                     |                     |       |              |                   |           |
| End of phase 1 (d 85)                | 36.72 <sup>a</sup>  | 39.46 <sup>b</sup>  | 0.817 | <b>0.032</b> | 0.301             | 0.923     |
| End of phase 2 (d 119)               | 69.45 <sup>a</sup>  | 73.97 <sup>b</sup>  | 1.506 | <b>0.052</b> | 0.911             | 0.492     |
| Finisher                             |                     |                     |       |              |                   |           |
| End of phase 1 (d 141)               | 92.36 <sup>x</sup>  | 96.94 <sup>y</sup>  | 1.590 | 0.061        | 0.166             | 0.586     |
| End of phase 2 (d 159)               | 112.39 <sup>x</sup> | 117.20 <sup>y</sup> | 1.900 | 0.095        | 0.122             | 0.601     |
| End of phase 3 (d 181)               | 132.24 <sup>x</sup> | 136.37 <sup>y</sup> | 1.550 | 0.081        | 0.064             | 0.373     |
| <b>Average daily gain, kg/d</b>      |                     |                     |       |              |                   |           |
| Pre weaning                          | 0.27                | 0.28                | 0.013 | 0.385        |                   |           |
| NP1 (d 21-29)                        | -0.02               | 0.01                | 0.013 | 0.124        |                   |           |
| NP2 (d 29-50)                        | 0.30 <sup>a</sup>   | 0.38 <sup>b</sup>   | 0.015 | <b>0.002</b> | 0.175             | 0.572     |
| NP3 (d 50-62)                        | 0.61 <sup>a</sup>   | 0.68 <sup>b</sup>   | 0.014 | <b>0.006</b> | 0.074             | 0.112     |
| G1 (d 62-85)                         | 0.76                | 0.75                | 0.016 | 0.827        | 0.800             | 0.279     |
| G2 (d 85-119)                        | 0.96                | 1.02                | 0.028 | 0.216        | 0.294             | 0.326     |
| F1 (d 119-140)                       | 1.09                | 1.09                | 0.02  | 0.913        | <b>&lt; 0.001</b> | 0.683     |
| F2 (d 140-159)                       | 1.05                | 1.07                | 0.031 | 0.786        | 0.200             | 0.835     |
| F3 (d 159-181)                       | 1.04                | 1.01                | 0.063 | 0.694        | 0.993             | 0.733     |
| NP2 to NP3 (d 29-50)                 | 0.41 <sup>a</sup>   | 0.49 <sup>b</sup>   | 0.014 | <b>0.002</b> | 0.114             | 0.328     |
| Overall Grower (d 62-119)            | 0.88                | 0.91                | 0.021 | 0.341        | 0.350             | 0.639     |
| Overall Finisher (d 119-181)         | 1.06                | 1.06                | 0.021 | 0.832        | <b>0.032</b>      | 0.772     |
| Overall Growing/finishing (d 62-181) | 0.97                | 0.98                | 0.012 | 0.542        | <b>0.012</b>      | 0.525     |
| Overall (d 29-181)                   | 0.85                | 0.87                | 0.010 | 0.110        | <b>0.046</b>      | 0.376     |

Four littermates were selected 4 days postpartum from 20 sows with two neonates transferred to offsite nursery facility and housed in deck while 2 cohorts remained with sows during d 4 to 21. Upon weaning at d 21, pigs with the same lactation treatments and gender were housed in pens to have four pigs per pen, and ten pens per treatment. Data were analyzed using GLM procedure of SAS with lactation treatment and gender used as fix effect, and pen was experimental unit.

<sup>a,b</sup>. Row with different superscripts differ significantly ( $P < 0.05$ ) <sup>x,y</sup>. Row with different superscripts tend to be differ ( $P < 0.10$ )
