# Supplementary material for: Isolated Rearing at Lactation Increases Gut Microbial Diversity and Post-weaning Performance in Pigs
Source: PubMed Central journal article supplement (PMC6282802; doi:10.3389/fmicb.2018.02889), 2018-11-29
Supplement: Table_2.pdf [file Table_2.pdf]

**Table S2.** Average daily feed intake and feed efficiency of pigs reared with the sow (SR) or in isolation (IR).

|                                                               | Treatments        |                   |       | Trt               | P - Value          |           |
|---------------------------------------------------------------|-------------------|-------------------|-------|-------------------|--------------------|-----------|
|                                                               | SR                | IR                | SEM   |                   | Sex                | Trt x Sex |
| <b>Average daily feed intake, kg/d</b>                        |                   |                   |       |                   |                    |           |
| NP1 (d 21-29)                                                 | 0.10 <sup>a</sup> | 0.16 <sup>b</sup> | 0.009 | <b>&lt;0.0001</b> |                    |           |
| NP2 (d 29-50)                                                 | 0.41 <sup>a</sup> | 0.51 <sup>b</sup> | 0.019 | <b>0.003</b>      | 0.141              | 0.303     |
| NP3 (d 50-62)                                                 | 0.91 <sup>x</sup> | 1.01 <sup>y</sup> | 0.040 | 0.097             | <b>0.050</b>       | 0.610     |
| G1 (d 62-85)                                                  | 1.68              | 1.63              | 0.113 | 0.726             | 0.191              | 0.416     |
| G2 (d 85-119)                                                 | 2.49              | 2.48              | 0.122 | 0.918             | 0.131              | 0.638     |
| F1 (d 119-140)                                                | 3.14              | 3.09              | 0.137 | 0.792             | <b>0.022</b>       | 0.733     |
| F2 (d 140-159)                                                | 3.35              | 3.27              | 0.125 | 0.678             | 0.064              | 0.962     |
| F3 (d 159-181)                                                | 3.46              | 3.15              | 0.133 | 0.119             | 0.105              | 0.480     |
| NP2 to NP3 (d 29-50)                                          | 0.59 <sup>a</sup> | 0.61 <sup>b</sup> | 0.026 | <b>0.017</b>      | 0.070              | 0.435     |
| Overall Grower (d 62-119)                                     | 2.17              | 2.13              | 0.103 | 0.820             | 0.614              | 0.491     |
| Overall Finisher (d 119-181)                                  | 3.31              | 3.17              | 0.121 | 0.420             | <b>0.034</b>       | 0.896     |
| Overall Growing/finishing (d 62-181)                          | 2.74              | 2.66              | 0.102 | 0.546             | 0.117              | 0.672     |
| Overall (d 29-181)                                            | 2.27              | 2.22              | 0.083 | 0.689             | 0.164              | 0.725     |
| <b>Gain-to-feed ratio</b>                                     |                   |                   |       |                   |                    |           |
| NP1 (d 21-29)                                                 | -0.44             | 0.04              | 0.199 | 0.110             |                    |           |
| NP2 (d 29-50)                                                 | 0.71              | 0.70              | 0.017 | 0.486             | 0.851              | 0.403     |
| NP3 (d 50-62)                                                 | 0.68 <sup>b</sup> | 0.64 <sup>a</sup> | 0.015 | <b>0.053</b>      | 0.116              | 0.343     |
| G1 (d 62-85)                                                  | 0.47              | 0.45              | 0.029 | 0.691             | 0.274              | 0.549     |
| G2 (d 85-119)                                                 | 0.39              | 0.39              | 0.014 | 0.900             | 0.261              | 0.076     |
| F1 (d 119-140)                                                | 0.34              | 0.32              | 0.010 | 0.249             | 0.508              | 0.669     |
| F2 (d 140-159)                                                | 0.34              | 0.33              | 0.009 | 0.553             | 0.176              | 0.643     |
| F3 (d 159-181)                                                | 0.27              | 0.26              | 0.019 | 0.883             | 0.348              | 0.486     |
| NP2 to NP3 (d 29-50)                                          | 0.70 <sup>b</sup> | 0.66 <sup>a</sup> | 0.011 | 0.055             | 0.214              | 0.889     |
| Overall Grower (d 62-119)                                     | 0.41              | 0.41              | 0.016 | 0.750             | 0.926              | 0.191     |
| Overall Finisher (d 119-181)                                  | 0.31              | 0.30              | 0.010 | 0.595             | 0.246              | 0.592     |
| Overall Growing/finishing (d 62-181)                          | 0.35              | 0.34              | 0.010 | 0.657             | 0.354              | 0.264     |
| Overall (d 29-181)                                            | 0.37              | 0.36              | 0.010 | 0.729             | 0.272              | 0.273     |
| <b>Carcass traits</b>                                         |                   |                   |       |                   |                    |           |
| 10 <sup>th</sup> rib back fat depth, mm                       | 20.00             | 23.09             | 1.00  | <b>0.046</b>      | <b>0.000</b>       | 0.680     |
| 10 <sup>th</sup> rib longissimus muscle area, cm <sup>2</sup> | 47.21             | 49.50             | 0.85  | 0.079             | 0.127              | 0.984     |
| Lean, %                                                       | 38.52             | 38.21             | 0.35  | 0.539             | <b>&lt; 0.0001</b> | 0.833     |

<sup>a,b</sup>. Row with different superscripts differ significantly ( $P < 0.05$ )

<sup>x,y</sup>. Row with different superscripts tend to be differ ( $P < 0.10$ )
