# Supplementary material for: Isolated Rearing at Lactation Increases Gut Microbial Diversity and Post-weaning Performance in Pigs
Source: PubMed Central journal article supplement (PMC6282802; doi:10.3389/fmicb.2018.02889), 2018-11-29
Supplement: Table_3.pdf [file Table_3.pdf]

Table S3. Bacteria operational taxonomy units (OTUs) that are most correlated with dependent variables.

| Variables                                  | OTUs |                  | Correlation coefficient | <i>P</i> - Value |
|--------------------------------------------|------|------------------|-------------------------|------------------|
| day 50 BW                                  | 224  | Fusicatenibacter | 0.29                    | 0.02             |
|                                            | 389  | Lactococcus      | 0.29                    | 0.02             |
| day 62 BW                                  | 224  | Fusicatenibacter | 0.32                    | 0.01             |
| ADG 2129                                   | 53   | Blautia          | 0.33                    | 0.01             |
| ADG 2950                                   | 11   | Leuconostoc      | 0.33                    | 0.01             |
|                                            | 389  | Lactococcus      | 0.33                    | 0.01             |
| ADG 2162                                   | 11   | Leuconostoc      | 0.33                    | 0.01             |
| day 21 Foxp3 <sup>+</sup> T <sub>reg</sub> | 389  | Lactococcus      | -0.27                   | 0.02             |
|                                            | 11   | Leuconostoc      | -0.24                   | 0.04             |

Individual pigs' fecal samples were collected on day 20, for sequencing of the V4 hypervariable region of 16S rRNA. Sequences were analyzed using mothur (1.34.0) pipeline. Regression based (ranked by the percent increase in mean square error) random forest analysis was used (Random Forest 4.6-12 package). Pearson correlation analysis was used to test correlation between OTUs and continuous variables (R). BW: body weight; ADG: average daily gain.
