# Supplementary material for: Isolated Rearing at Lactation Increases Gut Microbial Diversity and Post-weaning Performance in Pigs
Source: PubMed Central journal article supplement (PMC6282802; doi:10.3389/fmicb.2018.02889), 2018-11-29
Supplement: Table_5.pdf [file Table_5.pdf]

**Table S5.** Nursery, grower and finisher diets composition (% , as-fed basis)

| Phase                             | Nursery |       |       | Grower |        | Finisher |         |         |
|-----------------------------------|---------|-------|-------|--------|--------|----------|---------|---------|
|                                   | 1       | 2     | 3     | 1      | 2      | 1        | 2       | 3       |
| Duration, d/d                     | 21/29   | 30/50 | 51/62 | 62/85  | 85/119 | 119/141  | 141/159 | 159/181 |
| Ingredients, %                    |         |       |       |        |        |          |         |         |
| Corn                              | 34.93   | 42.69 | 47.04 | 54.38  | 52.75  | 57.27    | 60.24   | 78.11   |
| Soybean meal                      | 11.25   | 22.5  | 28    | 21.9   | 13.75  | 9.4      | 6.5     | 8       |
| Corn DDGS <sup>1</sup>            | 7.5     | 10    | 16.25 | 20     | 30     | 30       | 30      | 10      |
| Fat                               | 2.5     | 2.5   | 2.5   | 1      | 1      | 1        | 1       | 1       |
| MonoCa-P <sup>2</sup>             |         |       | 0.075 | 0.14   |        |          |         | 0.15    |
| Limestone                         | 0.2     | 0.525 | 0.77  | 1.26   | 1.3    | 1.25     | 1.175   | 1.1     |
| Salt                              | 0.2     | 0.35  | 0.5   | 0.6    | 0.5    | 0.5      | 0.5     | 0.975   |
| L-Lysine                          | 0.265   | 0.3   | 0.3   | 0.33   | 0.33   | 0.3      | 0.3     | 0.3     |
| DL-Methionine                     | 0.153   | 0.139 | 0.085 |        |        |          |         |         |
| L-Threonine                       | 0.049   | 0.056 | 0.036 | 0.036  | 0.007  |          |         | 0.076   |
| L-Tryptophan                      | 0.01    |       |       | 0.003  | 0.010  | 0.010    | 0.013   | 0.017   |
| Trace Mineral Premix <sup>3</sup> | 0.15    | 0.15  | 0.15  | 0.15   | 0.15   | 0.1      | 0.1     | 0.1     |
| Vitamin Premix <sup>4</sup>       | 0.25    | 0.25  | 0.25  | 0.15   | 0.15   | 0.125    | 0.125   | 0.125   |
| SDPP <sup>5</sup>                 | 3.5     | 1.5   |       |        |        |          |         |         |
| Milk Whey                         | 25      | 12    |       |        |        |          |         |         |
| Other <sup>6</sup>                | 14.045  | 7.045 | 4.045 | 0.0485 | 0.0485 | 0.0485   | 0.0485  | 0.0485  |
| Total                             | 100     | 100   | 100   | 100    | 100    | 100      | 100     | 100     |
| Calculate:                        |         |       |       |        |        |          |         |         |
| ME <sup>7</sup> , Mcal/kg         | 3.480   | 3.434 | 3.401 | 3.35   | 3.36   | 3.37     | 3.37    | 3.35    |
| CP <sup>8</sup> , %               | 22.97   | 24.45 | 24.68 | 20.8   | 19.5   | 17.8     | 16.6    | 13.4    |
| SID Lysine, %                     | 1.46    | 1.42  | 1.28  | 1.05   | 0.88   | 0.75     | 0.68    | 0.65    |
| Available P, %                    | 0.50    | 0.35  | 0.23  | 0.19   | 0.18   | 0.17     | 0.17    | 0.14    |
| Ca, %                             | 0.85    | 0.75  | 0.65  | 0.61   | 0.58   | 0.54     | 0.51    | 0.50    |
| SID M+C:Lys                       | 58.1    | 58.0  | 58.0  | 55.3   | 62.9   | 68.7     | 72.2    | 63.2    |
| SID Thr:Lys                       | 60.1    | 60.0  | 60.1  | 61.1   | 62.0   | 64.0     | 64.9    | 68.1    |
| SID Trp:Lys                       | 17.1    | 17.2  | 17.9  | 18.0   | 18.1   | 18.1     | 18.0    | 18.0    |

1. Corn distillers dried grain contains soluble with 5 to 9 % of fat. 2. Mono calcium phosphate. 3. Supplied 11023 IU vitamin A, 1653 IU vitamin D<sub>3</sub> as D-activated animal sterol, 44 IU vitamin E, 4.4 mg vitamin K as menadione sodium bisulfite complex, 33 mg pantothenic acid as D-calcium pantothenate, 55 mg niacin, 10 mg riboflavin, and 44 µg vitamin B<sub>12</sub> per kilogram of feed. 4. Supplied 0.30 mg Se as sodium selenite, 40 mg Mn as manganous oxide, 165 mg Zn as zinc oxide, 165 mg Fe as ferrous sulfate, 17 mg Cu as copper sulfate, and 0.30 mg of I as calcium iodate per kilogram of feed. 5. Spray dried porcine plasma (AP920<sup>®</sup>; APC, Inc., Ankeny, IA). 6 A 0.015% and 0.019 % phytase (Ronozyme<sup>®</sup> P CT; DSM Nutritional Products, Inc., Parsippany, NJ) were added in nursery and grower/finisher phases respectively; Feed preservative (Quinguard<sup>®</sup>; Novus International, Inc., St. Louis, MO) were supplemented at 0.03% in each phase; Milk lactose was provided at 3.5 % in nursery phase 1 only. Poultry by product was added at 4% throughout nursery phases. Fish meal was added at 6.5 and 3 % in nursery phase 1 and 2, respectively.
